# Supplementary material for: Size control synthesis of melanin-like polydopamine nanoparticles by tuning radicals
Source: Royal Society of Chemistry journal article supplement (doi:10.1039/c9py00517j), 2019-01-01
Supplement: c9py00517j1.pdf [file c9py00517j1.pdf]

## Supporting Information

# Size Control Synthesis of Melanin-Like Polydopamine Nanoparticles by Tuning Radicals

*Xianheng Wang,<sup>†</sup> Zhan Chen,<sup>†</sup> Peng Yang,<sup>†</sup> Junfei Hu,<sup>†</sup> Zhao Wang,<sup>\*,‡</sup> and Yiwen Li<sup>\*,†</sup>*

<sup>†</sup>College of Polymer Science and Engineering, State Key Laboratory of Polymer Materials Engineering, Sichuan University, Chengdu, 610065, China

<sup>‡</sup>Institute for Molecular Engineering, University of Chicago, Chicago, Illinois 60637, United States

E-mail: [ywli@scu.edu.cn](mailto:ywli@scu.edu.cn) (Y.L.), Tel: +86 028-85401066; [zwang12@uchicago.edu](mailto:zwang12@uchicago.edu) (Z.W.), Tel: 1 3307345391.

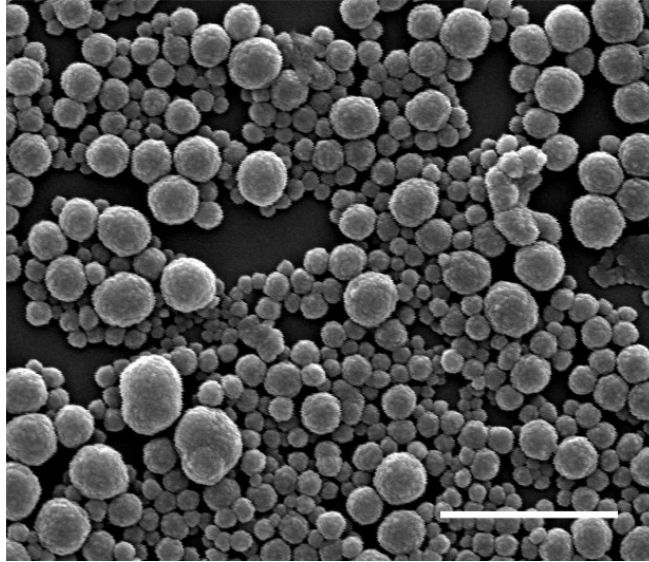

**Fig. S1** Representative SEM image of PDA NPs obtained in the presence of edaravone (Edaravone: dopamine=1, mol/mol) (pH=9.55). Scale bar, 1  $\mu\text{m}$ .

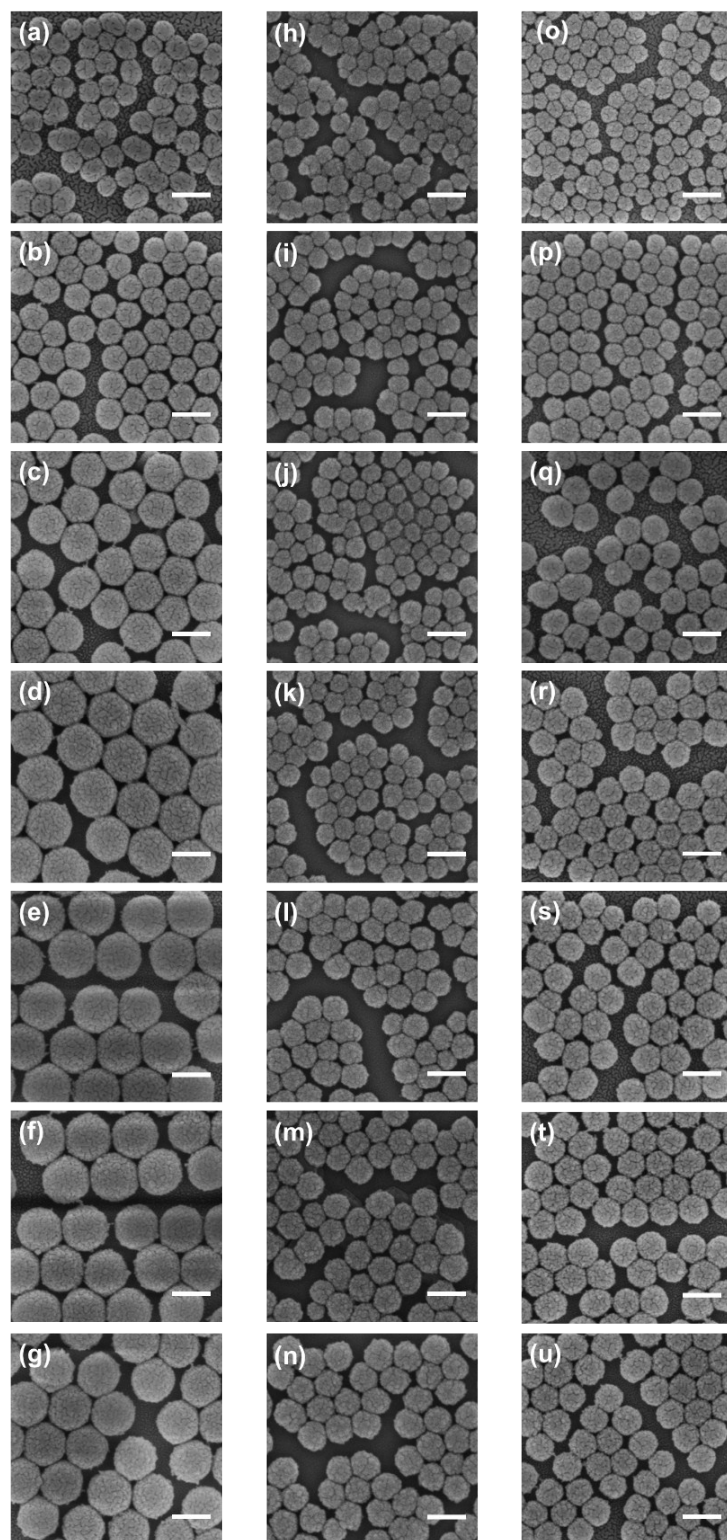

**Fig. S2** Representative SEM images of PDA NPs obtained at 1h, 2h, 4h, 6h, 8h, 10h and 12h in sequence (a)~(g) in the absence of additive, (h)~(n) in the presence of edaravone (Edaravone: dopamine=0.2, mol/mol) and (o)~(u) in the presence of PTIO (PTIO: dopamine=0.2, mol/mol) (pH=9.87). Scale bar, 200 nm.

**Table S1** Summary of physical parameters of PDA NPs obtained with different time at pH=9.87.

| Molar Ratio* | Time (h) | Diameter from SEM (nm) | Diameter from DLS (nm) | PDI   | Zeta Potential (mV) |
|--------------|----------|------------------------|------------------------|-------|---------------------|
| 0.00         | 1        | 120±13                 | 203                    | 0.138 | -24.3               |
| 0.00         | 2        | 153±12                 | 249                    | 0.156 | -26.3               |
| 0.00         | 4        | 201±12                 | 302                    | 0.158 | -25.5               |
| 0.00         | 6        | 228±14                 | 303                    | 0.006 | -25.9               |
| 0.00         | 8        | 240±13                 | 311                    | 0.108 | -28.1               |
| 0.00         | 10       | 237±13                 | 307                    | 0.043 | -26.8               |
| 0.00         | 12       | 230±14                 | 318                    | 0.073 | -25.1               |
| 0.20E        | 1        | 94±11                  | 169                    | 0.112 | -20.6               |
| 0.20E        | 2        | 101±15                 | 196                    | 0.044 | -30.9               |
| 0.20E        | 4        | 109±11                 | 224                    | 0.033 | -29.4               |
| 0.20E        | 6        | 123±10                 | 229                    | 0.074 | -36.2               |
| 0.20E        | 8        | 126±9                  | 240                    | 0.067 | -29.1               |
| 0.20E        | 10       | 132±16                 | 248                    | 0.029 | -30.9               |
| 0.20E        | 12       | 139±11                 | 239                    | 0.049 | -30.7               |
| 0.20P        | 1        | 89±12                  | 181                    | 0.064 | -26.3               |
| 0.20P        | 2        | 115±16                 | 215                    | 0.032 | -28.8               |
| 0.20P        | 4        | 143±13                 | 236                    | 0.002 | -22.8               |
| 0.20P        | 6        | 144±16                 | 240                    | 0.127 | -20.8               |
| 0.20P        | 8        | 156±20                 | 246                    | 0.111 | -22.8               |
| 0.20P        | 10       | 149±13                 | 235                    | 0.052 | -27.8               |
| 0.20P        | 12       | 144±19                 | 238                    | 0.128 | -28.9               |

\* E=Edaravone: dopamine, mol/mol; P=PTIO·: dopamine, mol/mol.

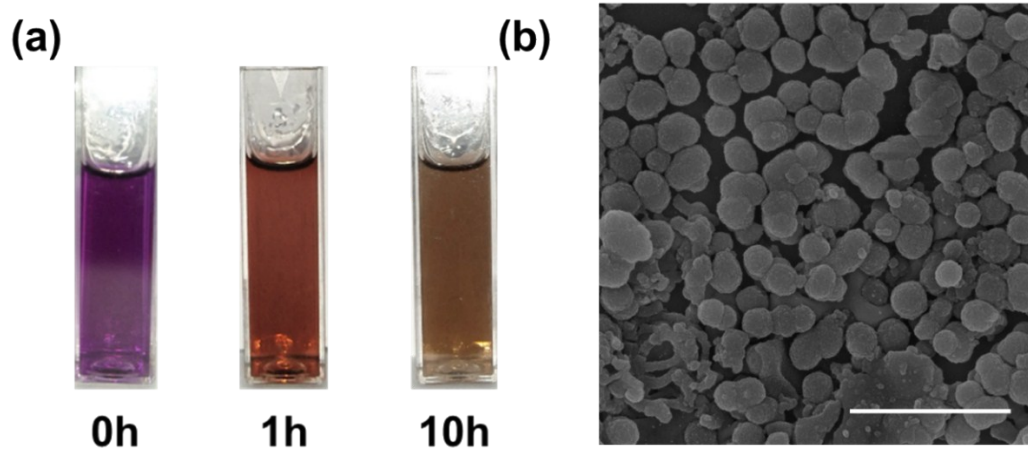

**Fig. S3** (a) The color change of the reaction solution in the presence of PTIO· (PTIO·: dopamine=0.1, mol/mol) without basic catalysis; (b) The SEM image of the product obtained after 10 hours of reaction, scale bar, 1 μm.

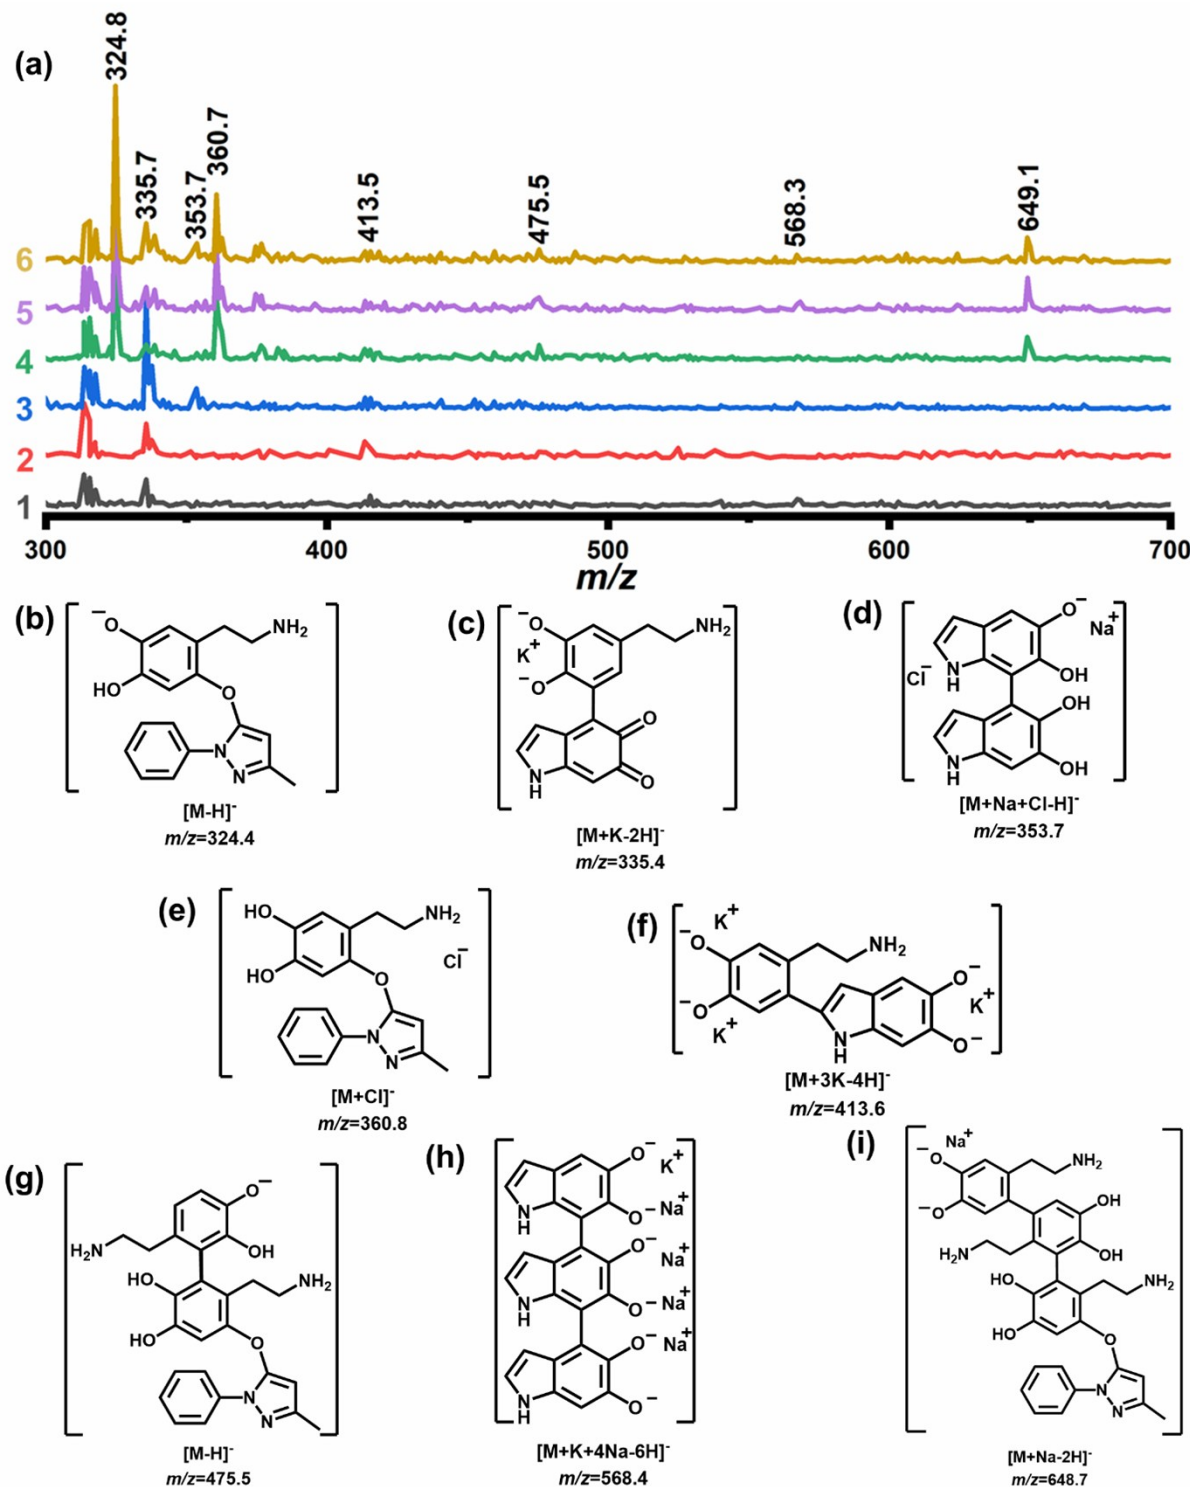

**Fig. S4** (a) ESI-MS spectra of the reaction solutions in the absence or presence of edaravone (Edaravone: dopamine=0.05, mol/mol) (pH=9.87). “1”, “2” and “3” corresponding to the reaction without edaravone after 1h, 2h and 4h reaction, respectively; and “4”, “5” and “6” corresponding to the reaction with edaravone after 1h, 2h and 4h reaction, respectively; (b)~(i) the possible structures assigned to main peaks.

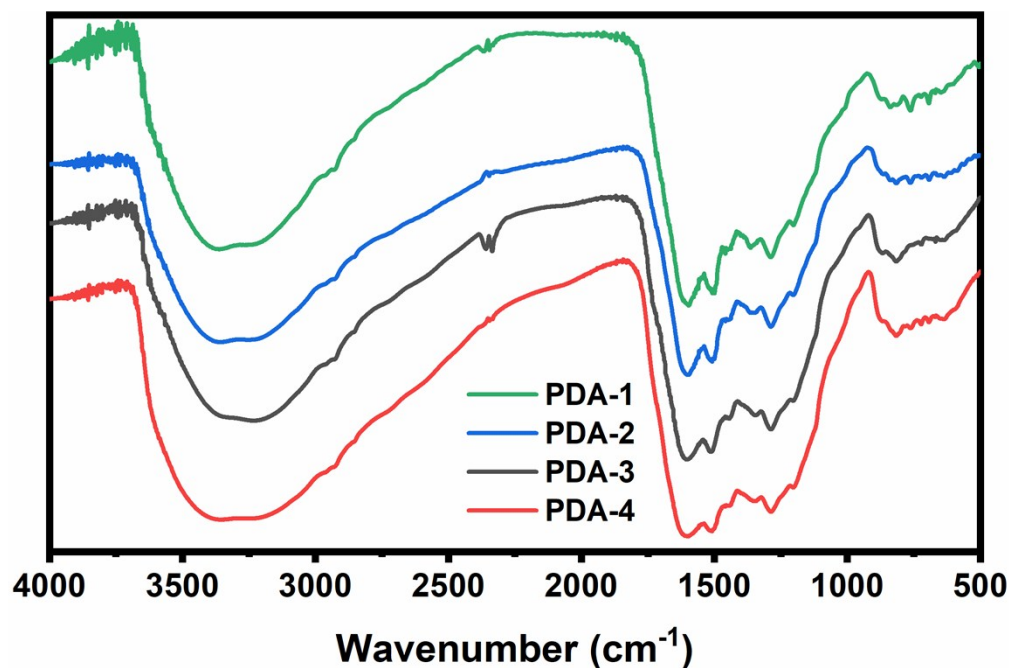

Fig. S5 FTIR spectra of PDA-i NPs (i=1-4).

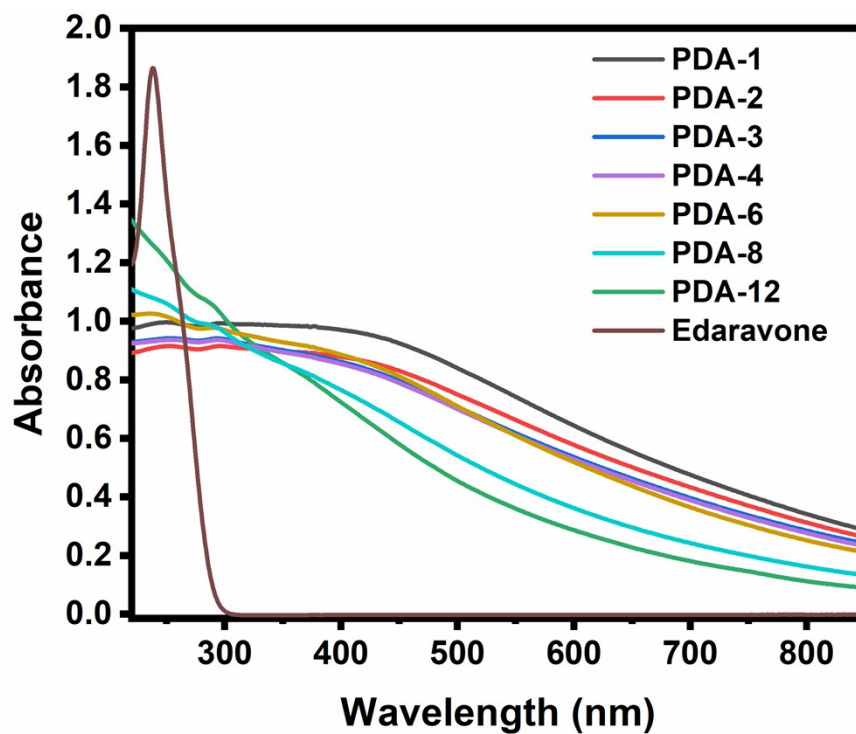

Fig. S6 UV-vis spectra of edaravone and PDA-i NPs (i=1-4, 6, 8, 12), with the same concentration of 30  $\mu\text{g/mL}$ .

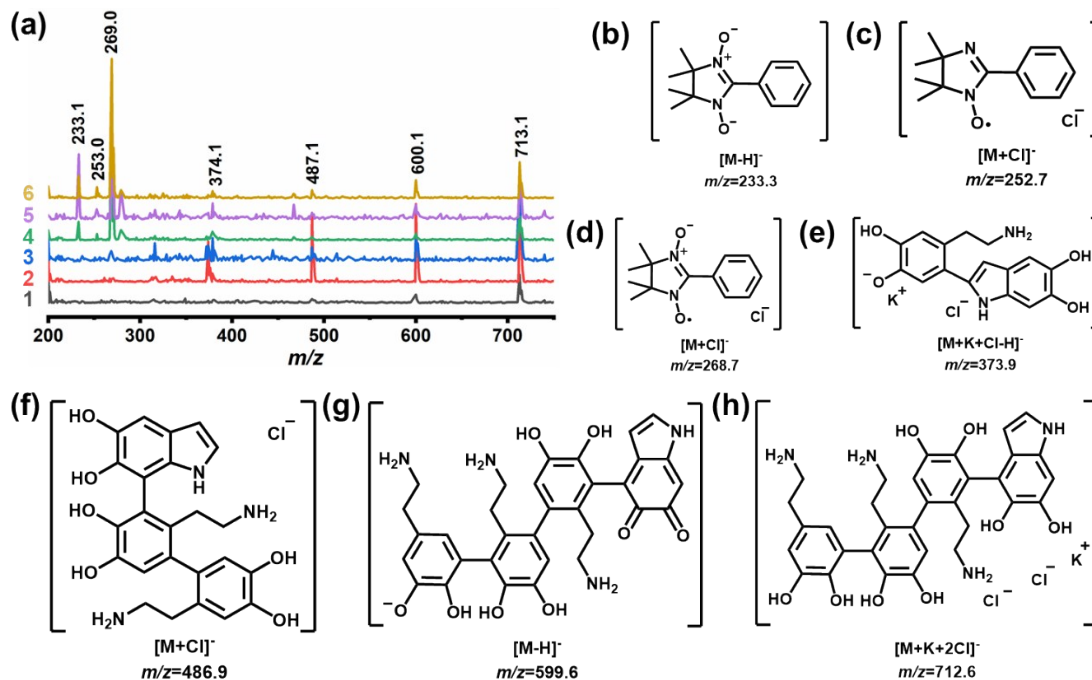

**Fig. S7** ESI-MS spectra of the crude PDA reaction solutions in the absence or presence of PTIO $\cdot$  (PTIO $\cdot$ : dopamine=0.5, mol/mol) (pH=9.87) (a) “1”, “2” and “3” corresponding to the reaction without PTIO $\cdot$  after 1h, 2h and 4h reaction, respectively, while “4”, “5” and “6” corresponding to the reaction with PTIO $\cdot$  after 1h, 2h and 4h reaction, respectively; (b)~(d) the possible derivatives of PTIO $\cdot$ ; and (e)~(h) the possible structures assigned to main peaks.

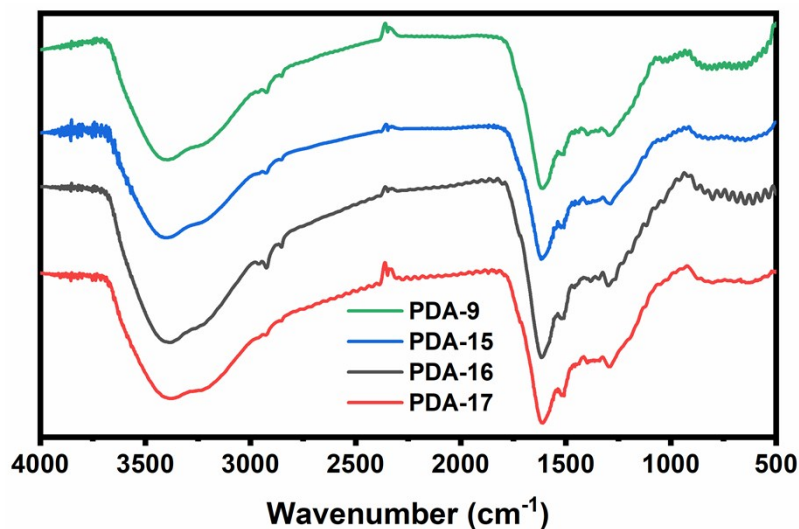

**Fig. S8** FTIR spectra of PDA-i NPs (i=9, 15, 16, 17).



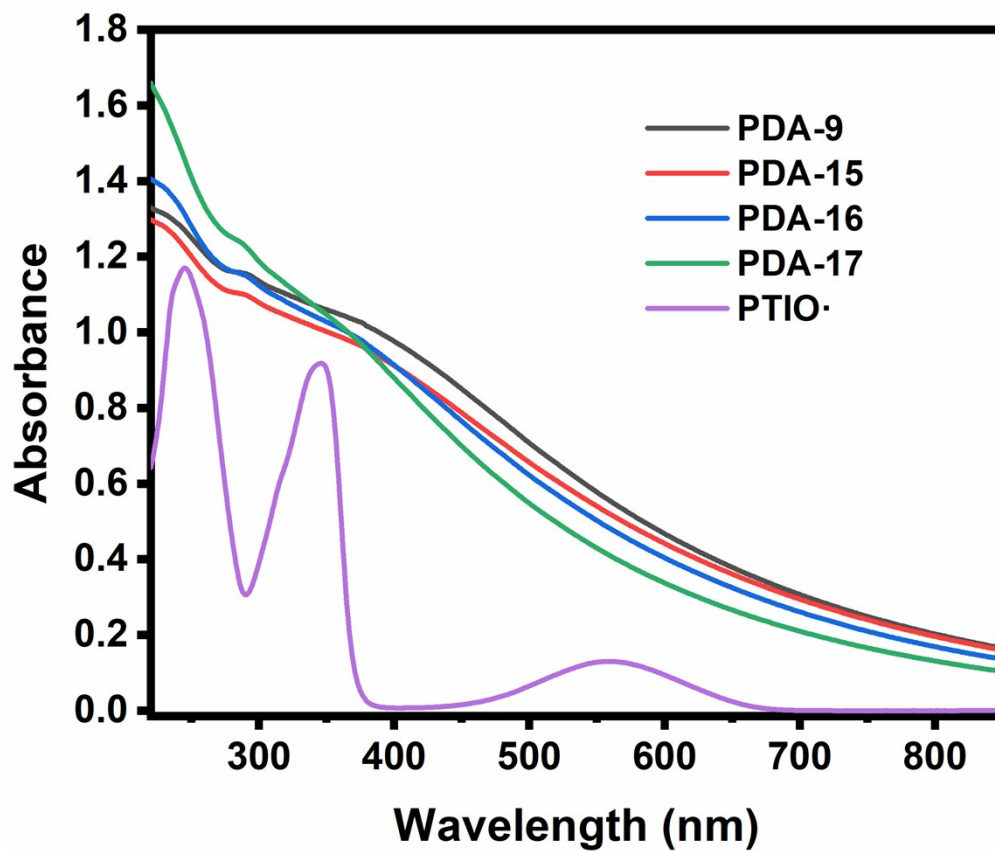

**Fig. S9** UV-vis spectra of PTIO· and PDA-*i* NPs (*i*=9, 15, 16, 17), with the same concentration of 30 µg/mL.

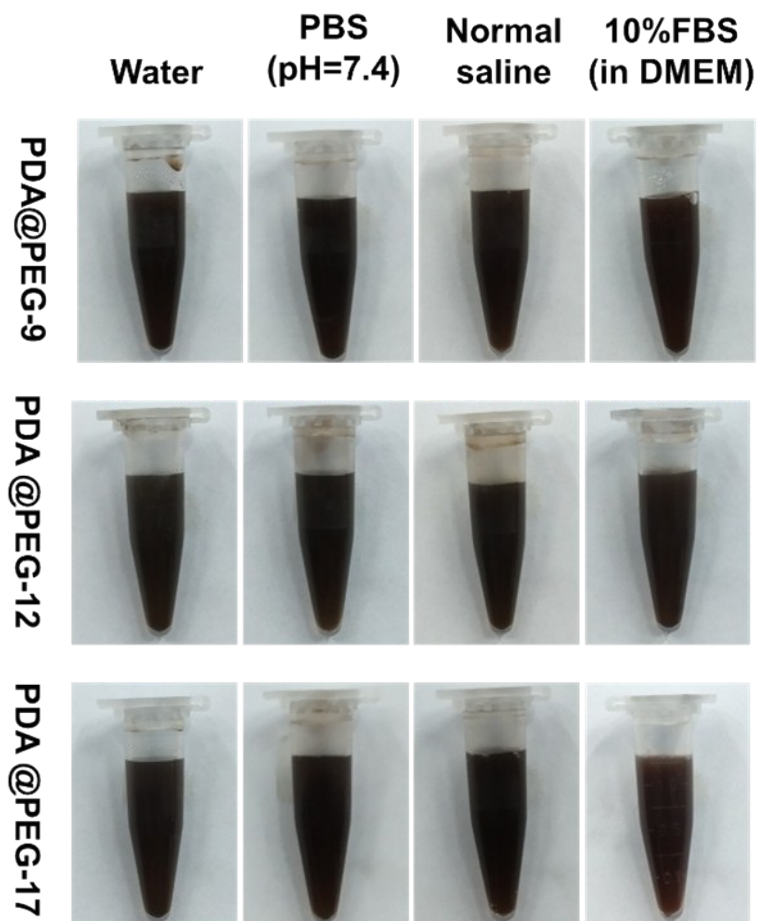

**Fig. S10** Dispersion stability of PEG-modified PDA-i NPs (i=9, 12, 17) in water, PBS (pH=7.4), normal saline and DMEM supplemented with 10% FBS (v/v). Nanoparticle concentration is 0.4 mg/mL and the optical photos were taken after a natural rest of 24 hours.
